# Supplementary material for: Factors driving the self-assembly of water-soluble calix[4]arene and gemini guests: a combined solution, computational and solid-state study
Source: Royal Society of Chemistry journal article supplement (doi:10.1039/c4ra09353d), 2014-10-10
Supplement: c4ra09353d1.pdf [file c4ra09353d1.pdf]

## *Electronic supplementary information*

### **Factors driving the self-assembling of water-soluble calix[4]arene and gemini guests: a combined solution, computational and solid-state study**

Carmela Bonaccorso,<sup>\*a</sup> Giovanna Brancatelli,<sup>b</sup> Giuseppe Forte,<sup>c</sup> Giuseppe Arena,<sup>a</sup> Silvano Geremia,<sup>b</sup> Domenico Sciotto<sup>a</sup> and Carmelo Sgarlata<sup>\*a,d</sup>

<sup>a</sup> Dipartimento di Scienze Chimiche, Università degli Studi di Catania, Viale A. Doria 6, 95125, Catania, Italy

<sup>b</sup> Centro di Eccellenza di Biocristallografia, Dipartimento di Scienze Chimiche e Farmaceutiche, Università degli Studi di Trieste, Via L. Giorgieri 1, 34127, Trieste, Italy

<sup>c</sup> Dipartimento di Scienze del Farmaco, Università degli Studi di Catania, Viale A. Doria 6, 95125, Catania, Italy

<sup>d</sup> Consorzio I.N.B.B., Viale delle Medaglie d'Oro 305, 00136, Roma, Italy

*email:* sgarlata@unict.it, bonaccorsoc@gmail.com

- Page S3 **Fig. S1** Fluctuation of the distances  $O_w - O_b$ .  
**Fig. S2** Fluctuation of the distances  $C_e - O_b$ ; only the distances of guests with  $n = 2$  and 5 are reported.
- Page S4 **Table S1.** Crystal data and structure refinement for **TAC4** and complexes **1**, **2** and **3**.
- Page S5 **Fig. S3** a) Asymmetric unit of crystal **1**. Green and red spheres represent chloride anions and water molecules, respectively. Hydrogen atoms were omitted for clarity. b) Detail of the intermolecular interactions between host, guest and water molecule. Green and red spheres represent the chloride anion and the water molecule, respectively.
- Page S5 **Fig. S4** Crystal packing of **1**: a) self-assembly of two complexes in an antiparallel fashion, sandwiched by two external **BSC2** anions; b) propagation of the complex pairs along the  $bc$  plane, alternating with the **BSC2** anions. Water molecules and chloride anions were omitted for clarity.
- Page S6 **Fig. S5** a) The asymmetric unit of crystal **2** showing the two independent complexes **I** and **II** depicted in violet and green, respectively. Green and red spheres represent chloride anions and water molecules, respectively. Hydrogen atoms were omitted for clarity. b) Detail of the intermolecular interactions between the two complexes and

involving water molecules.

Page S6 **Fig. S6** Crystal packing of **2**: infinite chains of host-guest complexes head-to-tail oriented, extending along the *a* axis a) and b) view of parallel chains. Water molecules and chloride anions were omitted for clarity.

Page S7 **Fig. S7** a) The asymmetric unit of **3** showing the three independent complexes **I**, **II** and **III**, depicted in blue, green and violet, respectively, arranged in a trimeric supramolecular assembly. Green and red spheres represent chloride anions and water molecules, respectively. Hydrogen atoms were omitted for clarity. b) Dense network of hydrogen bonding interactions stabilizing the trimeric assembly and involving sulfonate groups from guests, dimethylammonium groups from hosts and several solvating water molecules.

Page S7 **Fig. S8** Overlay of the **TAC4** host in **1** (green), **2** (brown) and **3** (blue) crystal structures, highlighting the different cavity conformations adopted by the calixarene.

Page S8 **Table S2.** Non-covalent interactions C–H $\cdots\pi$  in the crystal structure of **1**, **2** and **3** complexes (distances in Å).

Page S8 **Table S3.** Comparison of the relevant conformational parameters of **1**, **2** and **3**: dihedral angles (°) between the lower calixarene mean plane and the aromatic planes of **TAC4** ( $\theta_A$   $\theta_B$   $\theta_C$   $\theta_D$ ), and between the lower calixarene mean plane and the mean plane of the *endo*-**BSC2** guest ( $\theta_{BS2}$ ).

Page S9 **Figure S9** Typical ITC titration of **BSC2** into **TAC4** in buffered aqueous solution (pH 6.8, 25 °C).

Page S9 **Figure S10** Typical ITC titration of **BSC3** into **TAC4** in buffered aqueous solution (pH 6.8, 25 °C).

Page S10 **Figure S11** Typical ITC titration of **BSC5** into **TAC4** in buffered aqueous solution (pH 6.8, 25 °C).

Page S10 **Figure S12** Typical ITC titration of **BSC6** into **TAC4** in buffered aqueous solution (pH 6.8, 25 °C).

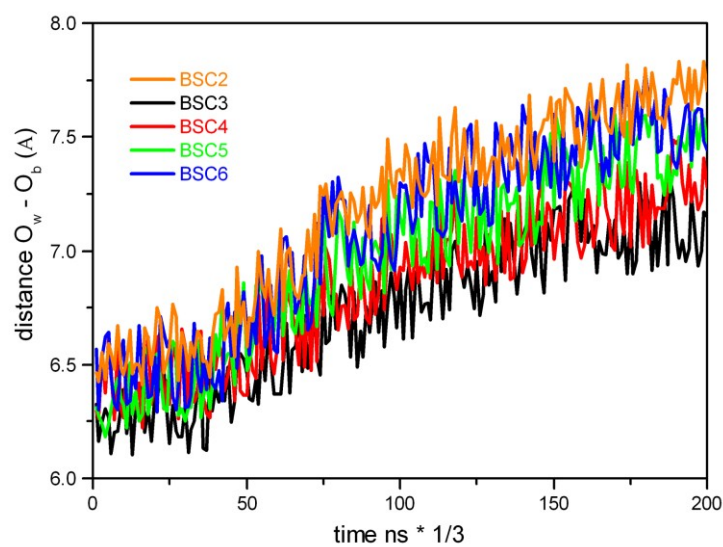

**Fig. S1** Fluctuation of the distances  $O_w - O_b$ .

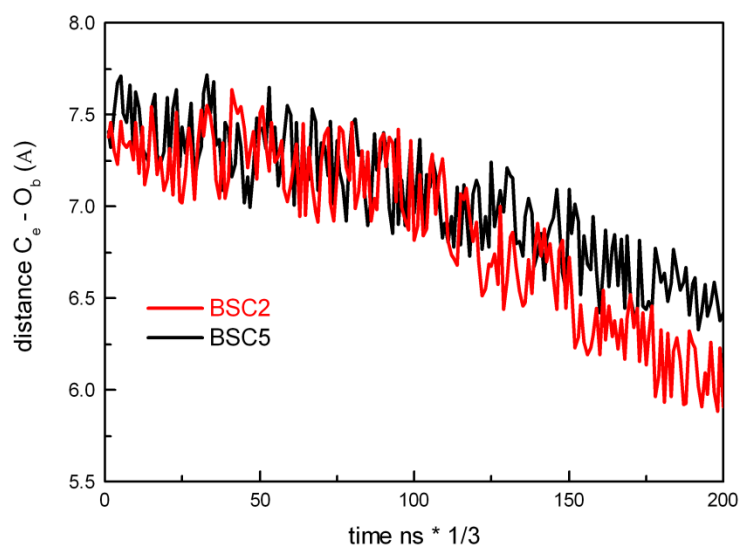

**Fig. S2** Fluctuation of the distances  $C_e - O_b$ ; only the distances of guests with  $n = 2$  and  $5$  are reported.

**Table S1.** Crystal data and structure refinement for **TAC4** and complexes **1**, **2** and **3**.

|                                                                             | <b>TAC4</b>                                                                                                                     | <b>1</b>                                                                                                                                                     | <b>2</b>                                                                                                                                                          | <b>3</b>                                                                                                                                                          |
|-----------------------------------------------------------------------------|---------------------------------------------------------------------------------------------------------------------------------|--------------------------------------------------------------------------------------------------------------------------------------------------------------|-------------------------------------------------------------------------------------------------------------------------------------------------------------------|-------------------------------------------------------------------------------------------------------------------------------------------------------------------|
| Formula                                                                     | C <sub>40</sub> H <sub>56</sub> N <sub>4</sub> O <sub>4</sub> , 4 Cl, 5 H <sub>2</sub> O                                        | C <sub>40</sub> H <sub>56</sub> N <sub>4</sub> O <sub>4</sub> , 1.5 (C <sub>16</sub> H <sub>16</sub> O <sub>8</sub> S <sub>2</sub> ), Cl, 4 H <sub>2</sub> O | 2 (C <sub>40</sub> H <sub>56</sub> N <sub>4</sub> O <sub>4</sub> ), 2 (C <sub>16</sub> H <sub>16</sub> O <sub>8</sub> S <sub>2</sub> ), 4 Cl, 12 H <sub>2</sub> O | 3 (C <sub>40</sub> H <sub>56</sub> N <sub>4</sub> O <sub>4</sub> ), 3 (C <sub>16</sub> H <sub>16</sub> O <sub>8</sub> S <sub>2</sub> ), 6 Cl, 10 H <sub>2</sub> O |
| Formula weight (Da)                                                         | 878.68                                                                                                                          | 1356.95                                                                                                                                                      | 2576.37                                                                                                                                                           | 3544.24                                                                                                                                                           |
| <i>T</i> (K)                                                                | 100                                                                                                                             | 100                                                                                                                                                          | 100                                                                                                                                                               | 100                                                                                                                                                               |
| $\lambda$ (Å)                                                               | 0.700                                                                                                                           | 0.800                                                                                                                                                        | 0.700                                                                                                                                                             | 0.700                                                                                                                                                             |
| Crystal system                                                              | Monoclinic                                                                                                                      | Triclinic                                                                                                                                                    | Triclinic                                                                                                                                                         | Trigonal                                                                                                                                                          |
| Space group                                                                 | <i>C</i> 2/ <i>c</i>                                                                                                            | <i>P</i> -1                                                                                                                                                  | <i>P</i> -1                                                                                                                                                       | <i>P</i> 3 <sub>2</sub>                                                                                                                                           |
| Unit cell dimensions (Å, °)                                                 | <i>a</i> = 14.290(1),<br>$\alpha$ = 90<br><i>b</i> = 30.628(2),<br>$\beta$ = 90.29(3)<br><i>c</i> = 10.624(2),<br>$\gamma$ = 90 | <i>a</i> = 14.69(1),<br>$\alpha$ = 113.62(2)<br><i>b</i> = 16.86(1),<br>$\beta$ = 101.51(4)<br><i>c</i> = 17.36(1),<br>$\gamma$ = 102.11(1)                  | <i>a</i> = 15.4765(2),<br>$\alpha$ = 100.475(4)<br><i>b</i> = 18.1323(3),<br>$\beta$ = 98.972(3)<br><i>c</i> = 23.5934(1),<br>$\gamma$ = 98.56(1)                 | <i>a</i> = 35.50(2),<br>$\alpha$ = 90<br><i>b</i> = 35.50(2),<br>$\beta$ = 90<br><i>c</i> = 14.80(1),<br>$\gamma$ = 120                                           |
| <i>V</i> (Å <sup>3</sup> )                                                  | 4649.8(10)                                                                                                                      | 3654(4)                                                                                                                                                      | 63223.0(2)                                                                                                                                                        | 16153(21)                                                                                                                                                         |
| <i>Z</i>                                                                    | 8                                                                                                                               | 2                                                                                                                                                            | 2                                                                                                                                                                 | 3                                                                                                                                                                 |
| $\rho_{\text{calc}}$ (g/mm <sup>3</sup> )                                   | 1.255                                                                                                                           | 1.233                                                                                                                                                        | 1.352                                                                                                                                                             | 1.093                                                                                                                                                             |
| $\mu$ (mm <sup>-1</sup> )                                                   | 0.291                                                                                                                           | 0.281                                                                                                                                                        | 0.234                                                                                                                                                             | 0.194                                                                                                                                                             |
| <i>F</i> (000)                                                              | 1856                                                                                                                            | 1434                                                                                                                                                         | 2708.0                                                                                                                                                            | 5621                                                                                                                                                              |
| Resolution (Å)                                                              | 15.33-0.90                                                                                                                      | 9.95-0.79                                                                                                                                                    | 22.79-0.73                                                                                                                                                        | 11.62-0.74                                                                                                                                                        |
| Reflections collected                                                       | 10506                                                                                                                           | 41705                                                                                                                                                        | 67794                                                                                                                                                             | 134131                                                                                                                                                            |
| Independent reflections                                                     | 3275                                                                                                                            | 12823                                                                                                                                                        | 29989                                                                                                                                                             | 38600                                                                                                                                                             |
| Data / restraints / parameters                                              | 3275 / 0 / 282                                                                                                                  | 10061 / 0 / 983                                                                                                                                              | 21692 / 12 / 1681                                                                                                                                                 | 38600 / 86 / 2213                                                                                                                                                 |
| <i>R</i> <sub>1</sub> , <i>wR</i> <sub>2</sub> [ <i>I</i> > 2σ( <i>I</i> )] | 0.0798, 0.2089                                                                                                                  | 0.1119, 0.2909                                                                                                                                               | 0.0872, 0.2211                                                                                                                                                    | 0.0811, 0.2098                                                                                                                                                    |
| <i>R</i> <sub>1</sub> , <i>wR</i> <sub>2</sub> (all data)                   | 0.1207, 0.2436                                                                                                                  | 0.1168, 0.2949                                                                                                                                               | 0.0910, 0.2235                                                                                                                                                    | 0.0855, 0.2174                                                                                                                                                    |
| GooF                                                                        | 1.018                                                                                                                           | 1.016                                                                                                                                                        | 1.074                                                                                                                                                             | 1.038                                                                                                                                                             |
| CCDC code number                                                            | 1005754                                                                                                                         | 1002190                                                                                                                                                      | 1002197                                                                                                                                                           | 1002465                                                                                                                                                           |

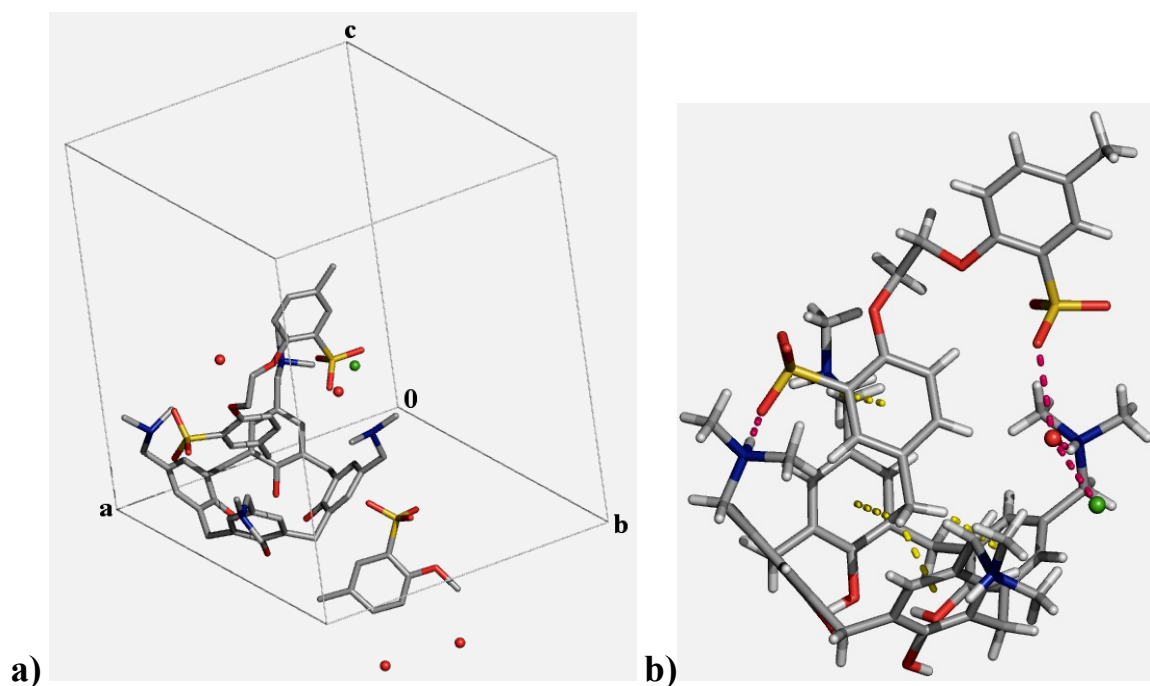

**Fig. S3** a) Asymmetric unit of crystal **1**. Green and red spheres represent chloride anions and water molecules, respectively. Hydrogen atoms were omitted for clarity. b) Detail of the intermolecular interactions between host, guest and water molecule. Green and red spheres represent the chloride anion and the water molecule, respectively.

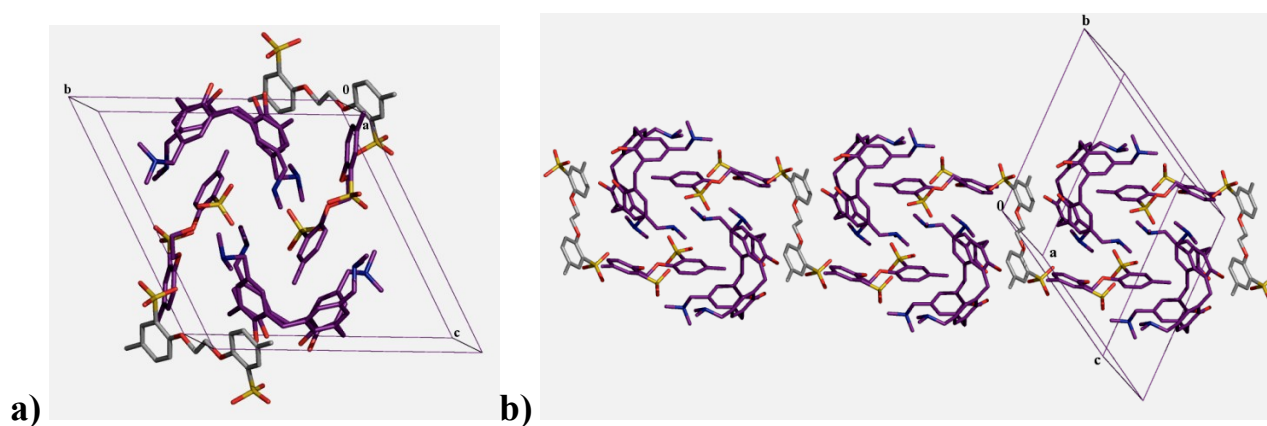

**Fig. S4** Crystal packing of **1**: a) self-assembly of two complexes in an antiparallel fashion, sandwiched by two external **BSC2** anions; b) propagation of the complex pairs along the *bc* plane, alternating with the **BSC2** anions. Water molecules and chloride anions were omitted for clarity.

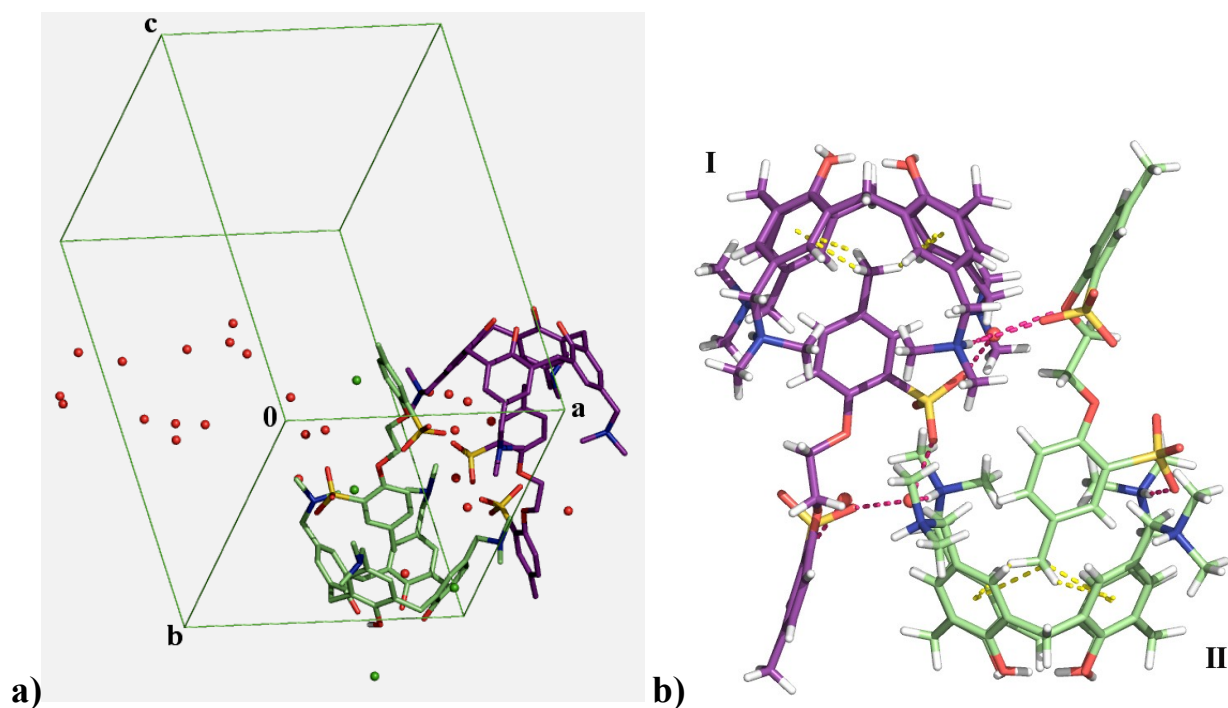

**Fig. S5** a) The asymmetric unit of crystal **2** showing the two independent complexes **I** and **II** depicted in violet and green, respectively. Green and red spheres represent chloride anions and water molecules, respectively. Hydrogen atoms were omitted for clarity. b) Detail of the intermolecular interactions between the two complexes and involving water molecules.

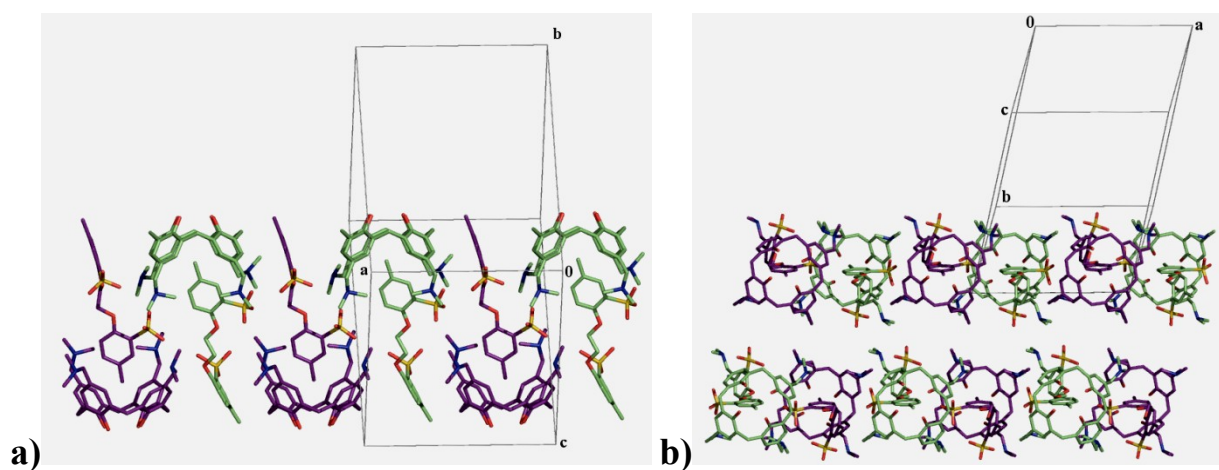

**Fig. S6** Crystal packing of **2**: infinite chains of host-guest complexes head-to-tail oriented, extending along the *a* axis a) and b) view of parallel chains. Water molecules and chloride anions were omitted for clarity.

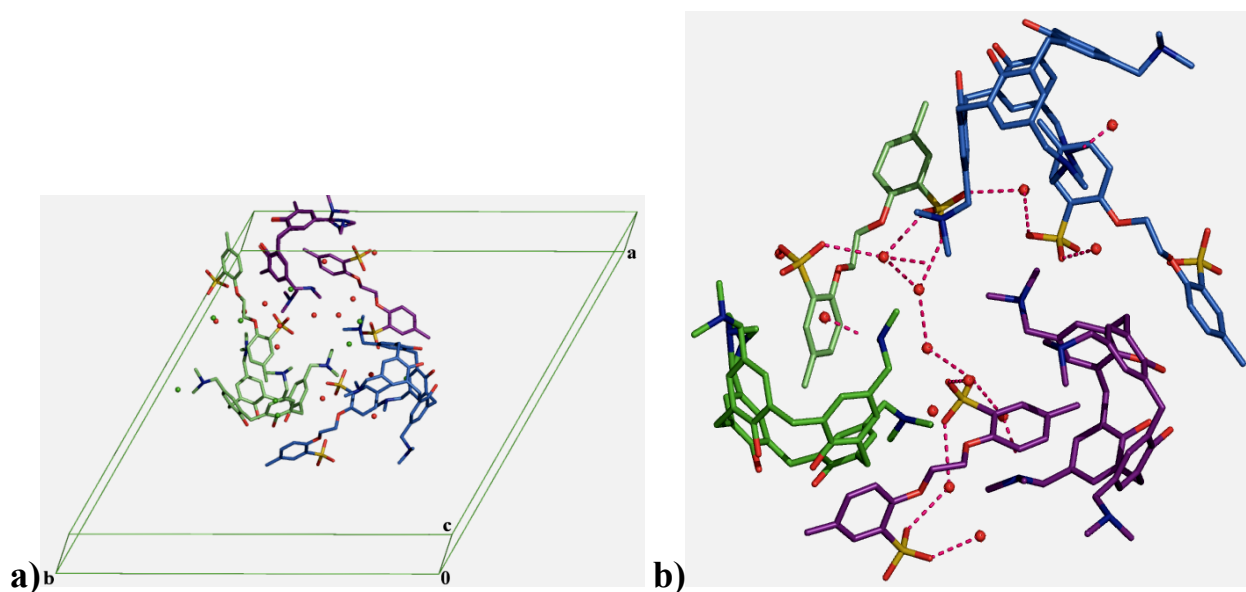

**Fig. S7** a) The asymmetric unit of **3** showing the three independent complexes **I**, **II** and **III**, depicted in blue, green and violet, respectively, arranged in a trimeric supramolecular assembly. Green and red spheres represent chloride anions and water molecules, respectively. Hydrogen atoms were omitted for clarity. b) Dense network of hydrogen bonding interactions stabilizing the trimeric assembly and involving sulfonate groups from guests, dimethylammonium groups from hosts and several solvating water molecules.

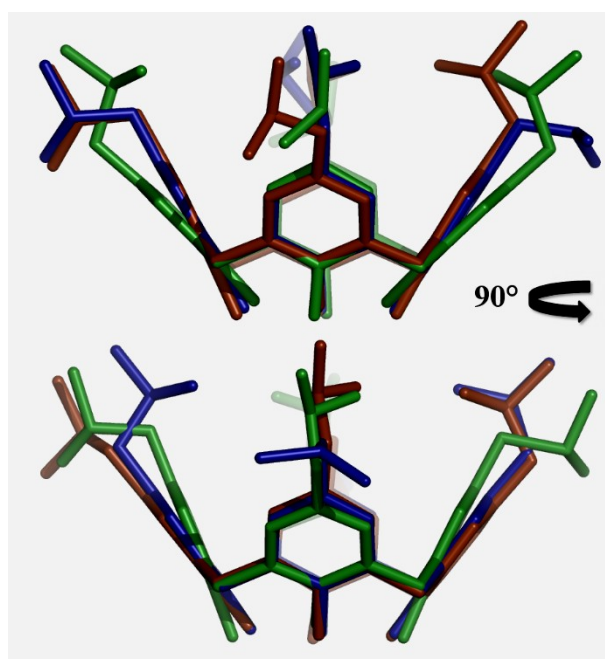

**Fig. S8** Overlay of the TAC4 host in **1** (green), **2** (brown) and **3** (blue) crystal structures, highlighting the different cavity conformations adopted by the calixarene.

**Table S2.** Non-covalent interactions C–H $\cdots\pi$  in the crystal structure of **1**, **2** and **3** complexes (distances in Å).

| <b>1</b>                         |         | <b>2</b>                         |         | <b>3</b>                         |         |
|----------------------------------|---------|----------------------------------|---------|----------------------------------|---------|
| <b>C–H<math>\cdots\pi</math></b> |         | <b>C–H<math>\cdots\pi</math></b> |         | <b>C–H<math>\cdots\pi</math></b> |         |
|                                  |         | <b>I</b>                         |         | <b>I</b>                         |         |
| C(5h) $\cdots$ Cg(A)             | 3.65(2) | C(5h) $\cdots$ Cg(A)             | 3.53(5) | C(5i) $\cdots$ Cg(A)             | 3.61(2) |
| C(5h) $\cdots$ Cg(B)             | 3.43(2) | C(5h) $\cdots$ Cg(B)             | 3.73(6) | C(5i) $\cdots$ Cg(B)             | 3.78(2) |
| C(5h) $\cdots$ Cg(C)             | 3.75(2) | C(5h) $\cdots$ Cg(C)             | 3.53(4) | C(5i) $\cdots$ Cg(C)             | 3.79(2) |
| C(4h) $\cdots$ Cg <sub>BS2</sub> | 3.50(2) | C(5h) $\cdots$ Cg(D)             | 3.80(5) | C(5i) $\cdots$ Cg(D)             | 3.76(3) |
|                                  |         | <b>II</b>                        |         | <b>II</b>                        |         |
|                                  |         | C(11h) $\cdots$ Cg(A)            | 3.53(4) | C(11i) $\cdots$ Cg(A)            | 3.57(2) |
|                                  |         | C(11h) $\cdots$ Cg(B)            | 3.59(5) | C(11i) $\cdots$ Cg(B)            | 3.82(2) |
|                                  |         | C(11h) $\cdots$ Cg(C)            | 3.65(6) | C(11i) $\cdots$ Cg(C)            | 3.84(3) |
|                                  |         | C(11h) $\cdots$ Cg(D)            | 3.77(5) | C(11i) $\cdots$ Cg(D)            | 3.86(4) |
|                                  |         |                                  |         | <b>III</b>                       |         |
|                                  |         |                                  |         | C(18i) $\cdots$ Cg(A)            | 3.53(2) |
|                                  |         |                                  |         | C(18i) $\cdots$ Cg(B)            | 3.72(3) |
|                                  |         |                                  |         | C(18i) $\cdots$ Cg(C)            | 3.82(3) |
|                                  |         |                                  |         | C(18i) $\cdots$ Cg(D)            | 3.77(2) |

**Table S3.** Comparison of the relevant conformational parameters of **1**, **2** and **3**: dihedral angles (°) between the lower calixarene mean plane<sup>a</sup> and the aromatic planes of **TAC4** ( $\theta_A$   $\theta_B$   $\theta_C$   $\theta_D$ ), and between the lower calixarene mean plane<sup>a</sup> and the mean plane of the *endo*-**BSC2** guest<sup>b</sup> ( $\theta_{BS2}$ ).

| $\theta_A$ | $\theta_B$ | $\theta_C$ | $\theta_D$ | $\theta_{BS2}$ |
|------------|------------|------------|------------|----------------|
| <b>1</b>   |            |            |            |                |
| 135.6(1)   | 115.9(2)   | 136.0(1)   | 113.1(1)   | 68.3(1)        |
| <b>2</b>   |            |            |            |                |
| <b>I</b>   |            |            |            |                |
| 116.7(1)   | 124.9(2)   | 120.9(1)   | 131.4(1)   | 69.2(1)        |
| <b>II</b>  |            |            |            |                |
| 125.3(1)   | 120.5(2)   | 123.0(1)   | 121.5(1)   | 69.4(1)        |
| <b>3</b>   |            |            |            |                |
| <b>I</b>   |            |            |            |                |
| 122.61(2)  | 122.28(2)  | 128.05(2)  | 121.35(2)  | 88.47(2)       |
| <b>II</b>  |            |            |            |                |
| 127.90(2)  | 122.41(2)  | 127.36(2)  | 118.74(2)  | 82.06(2)       |
| <b>III</b> |            |            |            |                |
| 122.28(2)  | 126.92(2)  | 121.63(2)  | 124.43(2)  | 88.10(2)       |

<sup>a</sup> The “lower” calixarene mean plane is defined by the four methylene bridging carbon atoms.

<sup>b</sup> The guest mean plane is defined by the six aromatic and the methyl carbon atoms of the guest end inserted into the calixarene cavity.

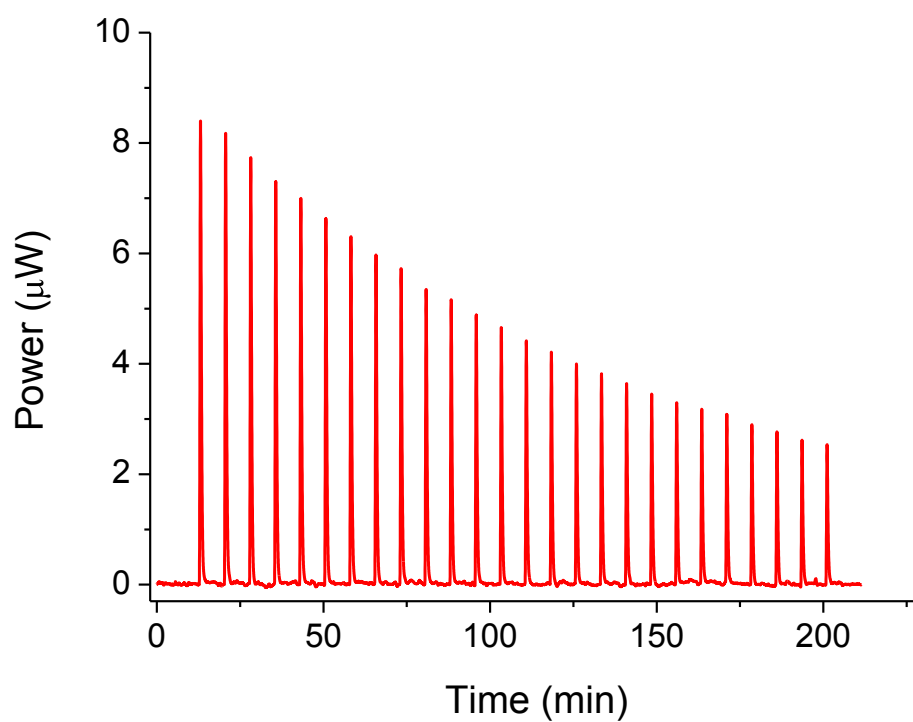

**Figure S9** Typical ITC titration of **BSC2** into **TAC4** in buffered aqueous solution (pH 6.8; 25 °C).

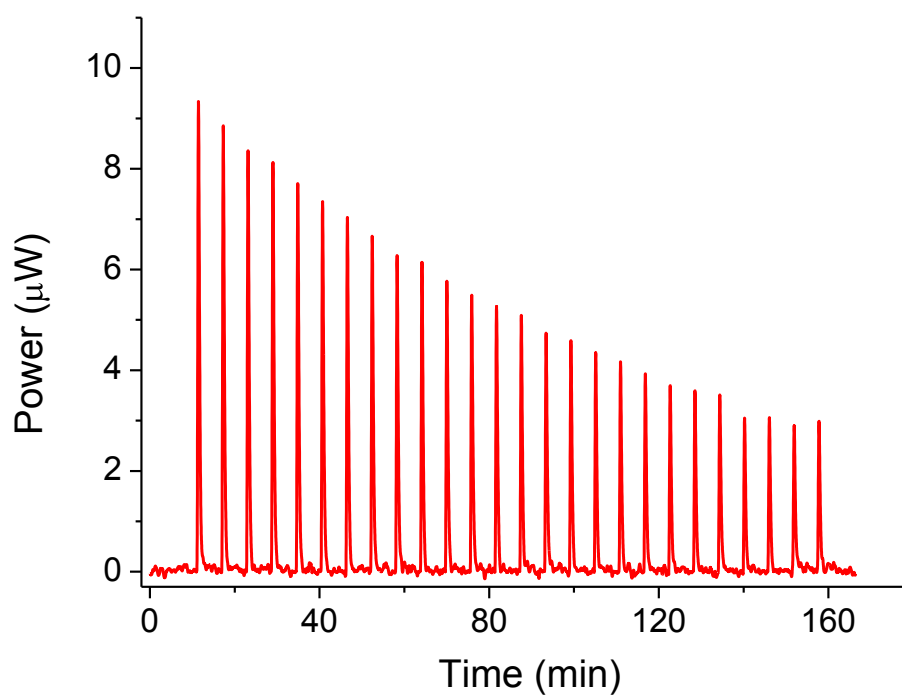

**Figure S10** Typical ITC titration of **BSC3** into **TAC4** in buffered aqueous solution (pH 6.8; 25 °C).

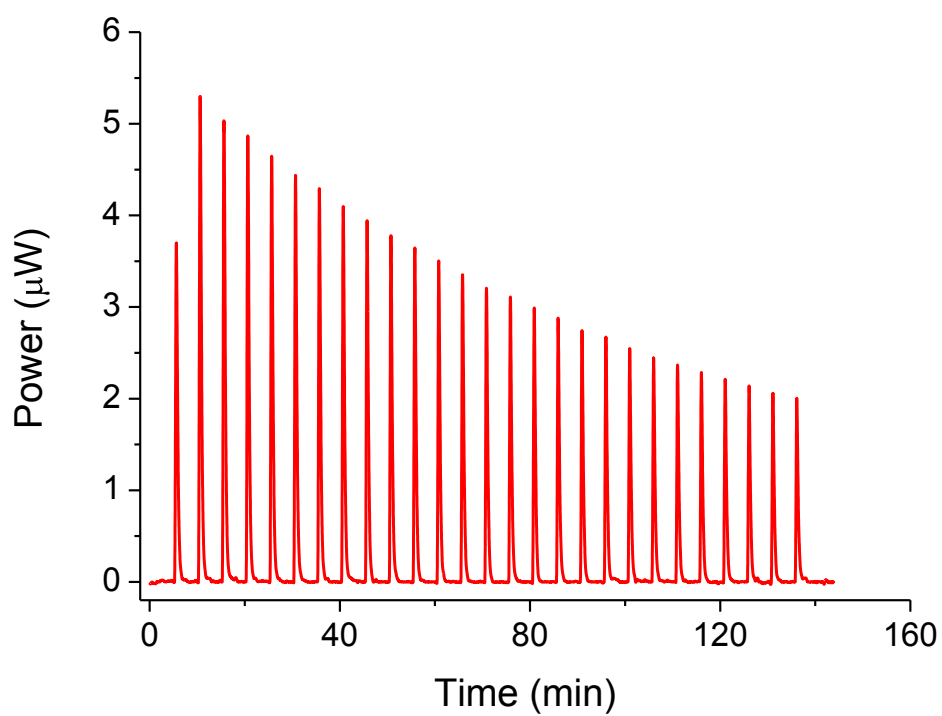

**Figure S11** Typical ITC titration of **BSC5** into **TAC4** in buffered aqueous solution (pH 6.8; 25 °C).

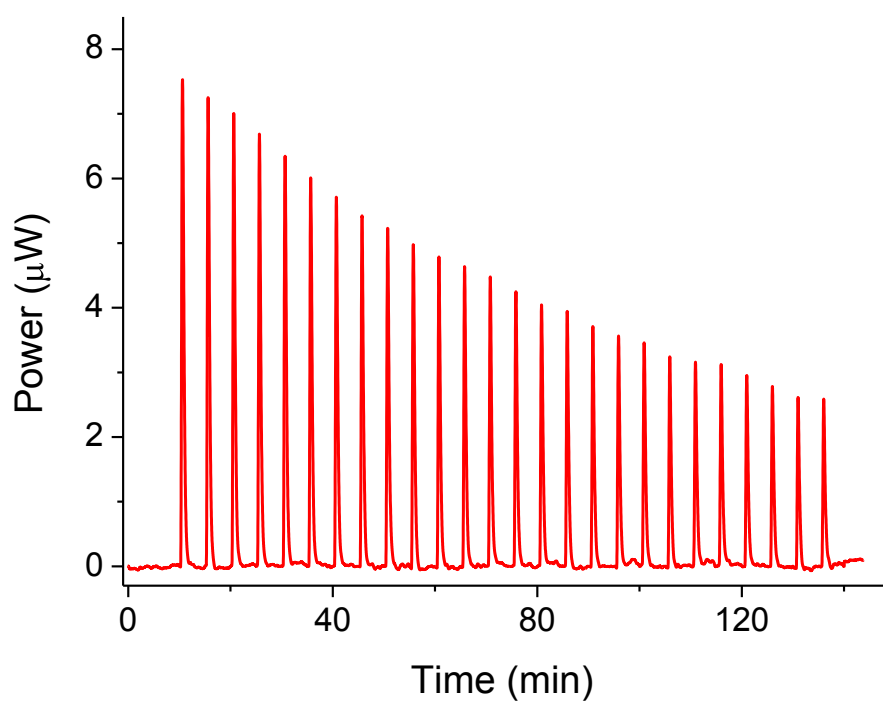

**Figure S12** Typical ITC titration of **BSC6** into **TAC4** in buffered aqueous solution (pH 6.8; 25 °C).
